# Supplementary material
Source: HighWire-hosted journal article supplement (https://thorax.bmj.com/content/75/11/928)

**SUPPLEMENTARY MATERIAL****Supplementary tables**

Table S1. Diagnoses and medicines used for definition of comorbidities and outcomes

Table S2. Definition of medications

Table S3. Definition of beta-blocker dosage categorization

Table S4. Usage of beta-blockers following MI

Table S5. Baseline characteristics according to type of MI and presence of heart failure

Table S6. Dosage of beta-blockers used in patients with COPD following MI

Table S7. Types of beta-blockers used in patients with COPD following MI

Table S8. Baseline characteristics according to presence of complete clinical data from Danish Register of COPD and high-risk patients with a history of frequent exacerbations and triple inhalation therapy

Table S9. Clinical characteristics of 1,118 patients with complete clinical data from Danish Register of COPD

Table S10. Usage of secondary prevention medications within 90 days after MI

**Supplementary figures**

Figure S1. Directed acyclic graph (DAG) for identification of potential confounders

**Table S1. Diagnoses and medicines used for definition of comorbidities and outcomes**

| Disease                                                                       | Definition                                                                                                                 |
|-------------------------------------------------------------------------------|----------------------------------------------------------------------------------------------------------------------------|
| Myocardial infarction                                                         | ICD10: I21; ICD8: 410                                                                                                      |
| ST elevation myocardial infarction (STEMI)                                    | ICD10: I210B, I211B, I213                                                                                                  |
| Chronic obstructive pulmonary disease                                         | ICD10: J42–J44; ICD8: 491–492                                                                                              |
| Hospital admission with exacerbation of chronic obstructive pulmonary disease | ICD10 J44 as primary diagnosis; or J44 as secondary diagnosis along with a primary diagnosis of DJ96 or DJ13–DJ18          |
| Heart failure                                                                 | ICD10: I110, I42, I50, J81                                                                                                 |
| Atrial fibrillation                                                           | ICD10: I48                                                                                                                 |
| Angina pectoris                                                               | ICD10: I20                                                                                                                 |
| Hypertension                                                                  | ICD10: I10–I15                                                                                                             |
| Peripheral vascular disease                                                   | ICD10: I700, I702, I709, I739                                                                                              |
| Cerebrovascular disease                                                       | ICD10: I60–I64, G458, G459                                                                                                 |
| Diabetes mellitus                                                             | ICD10: E10–E14; or ATC: A10                                                                                                |
| Renal failure                                                                 | ICD10: I120, I131, I132, E102, E112, E132, E142, N02–N08, N11, N14, N158, N159, N160, N162–N164, N168, N18, N19, N26, Z992 |
| Depression                                                                    | ICD10: F32–F34; or ATC: N06A                                                                                               |
| Asthma                                                                        | ICD10: J45                                                                                                                 |
| Cancer                                                                        | ICD10: C00–C97                                                                                                             |

ICD10: 10<sup>th</sup> revision of the International Classification of Diseases system.

ICD8: 8<sup>th</sup> revision of the International Classification of Diseases system.

ATC: Anatomical Therapeutic Chemical Classification System.

**Table S2. Definition of medications**

| <b>Drugs</b>                       | <b>ATC code</b>                                                                                         |
|------------------------------------|---------------------------------------------------------------------------------------------------------|
| Beta-blockers                      | C07                                                                                                     |
| Oral corticosteroids               | H02AB06                                                                                                 |
| Long acting inhalation medication  | Mono, dual, triple therapy corresponds to the usage of one, two or three of the medicines listed below. |
| Long-acting beta-2-agonists        | R03AC1; R03AL03-R03AL06                                                                                 |
| Long-acting muscarinic antagonists | R03BB; R03AL03-R03AL06                                                                                  |
| Inhaled corticosteroids            | R03BA; R03AK                                                                                            |

ATC: Anatomical Therapeutic Chemical Classification System

**Table S3. Definition of beta-blocker dosage categorization.**

Doses were categorized into thirds of the recommended maximum dose for each type of beta-blocker, i.e. low dose (minimum dose to 33% of maximum dose), medium dose (>33% to 67%), and high dose (>67% to maximum dose). Uncommon beta-blocker types were not included in the analysis due to negligible low number of users.

| Beta-blocker | Dosage category | Definition of daily dosage |
|--------------|-----------------|----------------------------|
| Metoprolol   | Low             | 12.5 - 67 mg               |
|              | Medium          | 68 - 133 mg                |
|              | High            | 134 - 200 mg               |
| Carvedilol   | Low             | 3.125 - 33 mg              |
|              | Medium          | 34 - 67 mg                 |
|              | High            | 68 - 100 mg                |
| Bisoprolol   | Low             | 1.25 - 6.7 mg              |
|              | Medium          | 6.8 - 13.3 mg              |
|              | High            | 13.4 - 20 mg               |
| Atenolol     | Low             | 12.5 - 33 mg               |
|              | Medium          | 34 - 67 mg                 |
|              | High            | 68 - 100 mg                |
| Sotalol      | Low             | 40 - 213 mg                |
|              | Medium          | 214 - 427 mg               |
|              | High            | 428 - 640 mg               |
| Propranolol  | Low             | 5 - 107 mg                 |
|              | Medium          | 108 - 213 mg               |
|              | High            | 214 - 320 mg               |

**Table S4. Usage of beta-blockers in patients with chronic obstructive pulmonary disease following first-time myocardial infarction.**

Numbers represent the point prevalence of beta-blocker users among patients alive and free of exacerbations at the specified times during follow-up estimated by claimed prescriptions.

| Time     | Subjects alive (n) | Beta-blocker users |
|----------|--------------------|--------------------|
| Day 1    | 10,884             | 3,298 (30.3%)      |
| Day 90   | 7,217              | 4,693 (65.0%)      |
| 6 months | 6,159              | 3,752 (60.9%)      |
| 1 year   | 4,868              | 2,994 (61.5%)      |
| 5 years  | 1,263              | 734 (58.1%)        |
| 10 years | 222                | 113 (50.9%)        |

**Table S5. Baseline characteristics of patients according to type of myocardial infarction and presence of heart failure following first-time myocardial infarction (MI) from 2003 to 2015.**

| Characteristic                  | Type of myocardial infarction |               |         | Heart failure at baseline |              |         |
|---------------------------------|-------------------------------|---------------|---------|---------------------------|--------------|---------|
|                                 | STEMI                         | NSTEMI        | P value | Yes                       | No           | P value |
| N                               | 1255                          | 9633          |         | 3612                      | 7276         |         |
| Age, median (IQR)               | 72 (64, 80)                   | 75 (68, 82)   | <0.0001 | 77 (70, 82)               | 74 (67, 81)  | <0.0001 |
| Sex                             |                               |               |         |                           |              |         |
| Male                            | 728 (58.0%)                   | 4934 (51.2%)  | <0.0001 | 1949 (54.0%)              | 3713 (51.0%) | 0.0040  |
| Frequent exacerbations          | 277 (22.1%)                   | 2872 (29.8%)  | <0.0001 | 1063 (29.4%)              | 2086 (28.7%) | 0.41    |
| Long-acting inhalation therapy  |                               |               |         |                           |              |         |
| None                            | 518 (41.3%)                   | 3517 (36.5%)  | 0.0018  | 1461 (40.4%)              | 2574 (35.4%) | <0.0001 |
| Mono                            | 167 (13.3%)                   | 1202 (12.5%)  |         | 428 (11.8%)               | 941 (12.9%)  |         |
| Dual                            | 316 (25.2%)                   | 2628 (27.3%)  |         | 957 (26.5%)               | 1987 (27.3%) |         |
| Triple                          | 254 (20.2%)                   | 2286 (23.7%)  |         | 766 (21.2%)               | 1774 (24.4%) |         |
| Type of myocardial infarction   |                               |               |         |                           |              |         |
| ST-segment elevation MI (STEMI) | 1255 (100.0%)                 | 0 (0.0%)      | <0.0001 | 387 (10.7%)               | 868 (11.9%)  | 0.0615  |
| Non-STEMI                       | 0 (0.0%)                      | 9633 (100.0%) |         | 3225 (89.3%)              | 6408 (88.1%) |         |
| Comorbidities                   |                               |               |         |                           |              |         |
| Heart failure                   | 387 (30.8%)                   | 3225 (33.5%)  | 0.0615  | 3612 (100.0%)             | 0 (0.0%)     | <0.0001 |
| Atrial fibrillation             | 188 (15.0%)                   | 2261 (23.5%)  | <0.0001 | 1156 (32.0%)              | 1293 (17.8%) | <0.0001 |
| Angina pectoris                 | 197 (15.7%)                   | 2642 (27.4%)  | <0.0001 | 1063 (29.4%)              | 1776 (24.4%) | <0.0001 |
| Hypertension                    | 491 (39.1%)                   | 4339 (45.0%)  | <0.0001 | 1839 (50.9%)              | 2991 (41.1%) | <0.0001 |
| Diabetes mellitus               | 184 (14.7%)                   | 2027 (21.0%)  | <0.0001 | 950 (26.3%)               | 1261 (17.3%) | <0.0001 |
| Peripheral vascular disease     | 123 (9.8%)                    | 1399 (14.5%)  | <0.0001 | 629 (17.4%)               | 893 (12.3%)  | <0.0001 |
| Cerebrovascular disease         | 126 (10.0%)                   | 1314 (13.6%)  | 0.0004  | 577 (16.0%)               | 863 (11.9%)  | <0.0001 |
| Cancer                          | 149 (11.9%)                   | 1387 (14.4%)  | 0.0156  | 503 (13.9%)               | 1033 (14.2%) | 0.70    |
| Chronic kidney disease          | 62 (4.9%)                     | 797 (8.3%)    | <0.0001 | 433 (12.0%)               | 426 (5.9%)   | <0.0001 |
| Asthma                          | 160 (12.7%)                   | 1246 (12.9%)  | 0.85    | 459 (12.7%)               | 947 (13.0%)  | 0.65    |
| Depression                      | 235 (18.7%)                   | 2353 (24.4%)  | <0.0001 | 898 (24.9%)               | 1690 (23.2%) | 0.0592  |

**Table S6. Dosage of beta-blockers used in patients with chronic obstructive pulmonary disease (COPD) following first-time myocardial infarction.**

Numbers represent the point prevalence of users of each beta-blocker dosage among patients alive and free of exacerbations of COPD at the specified times during follow-up. Numbers were estimated by claimed prescriptions. Uncommon beta-blockers were not included in the analysis due to negligible low number of users, and therefore the sum of users do not add up to the total number of beta-blocker users as shown in Table S5.

| Time     | Dosage | Beta-blocker users<br>n(%) |
|----------|--------|----------------------------|
| Day 1    | Low    | 2190 (67.1%)               |
|          | Medium | 800 (24.5%)                |
|          | High   | 274 (8.4%)                 |
| Day 90   | Low    | 2816 (60.3%)               |
|          | Medium | 1470 (31.5%)               |
|          | High   | 384 (8.2%)                 |
| 6 months | Low    | 2218 (59.6%)               |
|          | Medium | 1153 (31.0%)               |
|          | High   | 351 (9.4%)                 |
| 1 year   | Low    | 1702 (57.3%)               |
|          | Medium | 972 (32.7%)                |
|          | High   | 296 (10.0%)                |
| 5 years  | Low    | 363 (49.9%)                |
|          | Medium | 278 (38.2%)                |
|          | High   | 87 (12.0%)                 |
| 10 years | Low    | 57 (50.9%)                 |
|          | Medium | 40 (35.7%)                 |
|          | High   | 15 (13.4%)                 |

**Table S7. Types of beta-blockers used in patients with COPD following first-time myocardial infarction.**

Numbers represent the point prevalence of users of each beta-blocker type among patients alive and free of exacerbations of COPD at the specified times during follow-up. Numbers were estimated by claimed prescriptions.

| Time     | Beta-blocker category | Beta-blocker type | Number of users n(%) |
|----------|-----------------------|-------------------|----------------------|
| Day 1    | Beta-1-selective      | Metoprolol        | 2,300 (69.7%)        |
|          |                       | Bisoprolol        | 383 (11.6%)          |
|          |                       | Atenolol          | 97 (2.9%)            |
|          | Non-selective         | Carvedilol        | 333 (10.1%)          |
|          |                       | Propranolol       | 114 (3.5%)           |
|          |                       | Sotalol           | 37 (1.1%)            |
|          |                       | Other             | 34 (1.0%)            |
| Day 90   | Beta-1-selective      | Metoprolol        | 3,562 (75.9%)        |
|          |                       | Bisoprolol        | 522 (11.1%)          |
|          |                       | Atenolol          | 49 (1.0%)            |
|          | Non-selective         | Carvedilol        | 484 (10.3%)          |
|          |                       | Propranolol       | 40 (0.9%)            |
|          |                       | Sotalol           | 13 (0.3%)            |
|          |                       | Other             | 23 (0.5%)            |
| 6 months | Beta-1-selective      | Metoprolol        | 2,734 (72.9%)        |
|          |                       | Bisoprolol        | 431 (11.5%)          |
|          |                       | Atenolol          | 45 (1.2%)            |
|          | Non-selective         | Carvedilol        | 464 (12.4%)          |
|          |                       | Propranolol       | 36 (1.0%)            |
|          |                       | Sotalol           | 12 (0.3%)            |
|          |                       | Other             | 30 (0.8%)            |
| 1 year   | Beta-1-selective      | Metoprolol        | 2,174 (72.6%)        |
|          |                       | Bisoprolol        | 329 (11.0%)          |
|          |                       | Atenolol          | 37 (1.2%)            |
|          | Non-selective         | Carvedilol        | 394 (13.2%)          |
|          |                       | Propranolol       | 29 (1.0%)            |
|          |                       | Sotalol           | 7 (0.2%)             |
|          |                       | Other             | 24 (0.8%)            |
| 5 years  | Beta-1-selective      | Metoprolol        | 525 (71.5%)          |
|          |                       | Bisoprolol        | 75 (10.2%)           |
|          |                       | Atenolol          | 9 (1.2%)             |
|          | Non-selective         | Carvedilol        | 112 (15.3%)          |
|          |                       | Propranolol       | 5 (0.7%)             |
|          |                       | Sotalol           | 2 (0.3%)             |
|          |                       | Other             | 6 (0.8%)             |
| 10 years | Beta-1-selective      | Metoprolol        | 79 (69.8%)           |
|          |                       | Bisoprolol        | 14 (12.4%)           |
|          |                       | Atenolol          | 3 (2.7%)             |
|          | Non-selective         | Carvedilol        | 14 (12.4%)           |
|          |                       | Propranolol       | 1 (0.9%)             |
|          |                       | Sotalol           | 1 (0.9%)             |
|          |                       | Other             | 1 (0.9%)             |

**Table S8. Baseline characteristics of patients according to presence of complete clinical data from Danish Register of COPD, and a history of frequent exacerbations and triple inhalation therapy following first-time myocardial infarction (MI) from 2003 to 2015.**

| Characteristic                  | Complete clinical data from Danish Register of COPD |              |         | History of frequent exacerbations and triple therapy |              |         |
|---------------------------------|-----------------------------------------------------|--------------|---------|------------------------------------------------------|--------------|---------|
|                                 | Yes                                                 | No           | P value | Yes                                                  | No           | P value |
| N                               | 1118                                                | 9766         |         | 1358                                                 | 9526         |         |
| Age, median (IQR)               | 74 (67, 80)                                         | 75 (68, 82)  | 0.0006  | 75 (68, 81)                                          | 75 (67, 82)  | 0.46    |
| Sex                             |                                                     |              |         |                                                      |              |         |
| Male                            | 537 (48.0%)                                         | 5122 (52.4%) | 0.0051  | 590 (43.4%)                                          | 5069 (53.2%) | <0.0001 |
| Frequent exacerbations          | 563 (50.4%)                                         | 2585 (26.5%) | <0.0001 | 1358 (100.0%)                                        | 1790 (18.8%) | <0.0001 |
| Long-acting inhalation therapy  |                                                     |              |         |                                                      |              |         |
| None                            | 125 (11.2%)                                         | 3909 (40.0%) | <0.0001 | 0 (0.0%)                                             | 4034 (42.3%) | <0.0001 |
| Mono                            | 101 (9.0%)                                          | 1267 (13.0%) |         | 0 (0.0%)                                             | 1368 (14.4%) |         |
| Dual                            | 236 (21.1%)                                         | 2707 (27.7%) |         | 0 (0.0%)                                             | 2943 (30.9%) |         |
| Triple                          | 656 (58.7%)                                         | 1883 (19.3%) |         | 1358 (100.0%)                                        | 1181 (12.4%) |         |
| Type of myocardial infarction   |                                                     |              |         |                                                      |              |         |
| ST-segment elevation MI (STEMI) | 130 (11.6%)                                         | 1125 (11.5%) | 0.91    | 120 (8.8%)                                           | 1135 (11.9%) | 0.0009  |
| Non-STEMI                       | 988 (88.4%)                                         | 8641 (88.5%) |         | 1238 (91.2%)                                         | 8391 (88.1%) |         |
| Comorbidities                   |                                                     |              |         |                                                      |              |         |
| Heart failure                   | 369 (33.0%)                                         | 3241 (33.2%) | 0.90    | 406 (29.9%)                                          | 3204 (33.6%) | 0.0062  |
| Atrial fibrillation             | 270 (24.2%)                                         | 2179 (22.3%) | 0.16    | 279 (20.5%)                                          | 2170 (22.8%) | 0.0650  |
| Angina pectoris                 | 328 (29.3%)                                         | 2509 (25.7%) | 0.0085  | 319 (23.5%)                                          | 2518 (26.4%) | 0.0208  |
| Hypertension                    | 580 (51.9%)                                         | 4248 (43.5%) | <0.0001 | 574 (42.3%)                                          | 4254 (44.7%) | 0.0974  |
| Diabetes mellitus               | 218 (19.5%)                                         | 1993 (20.4%) | 0.47    | 226 (16.6%)                                          | 1985 (20.8%) | 0.0003  |
| Peripheral vascular disease     | 166 (14.8%)                                         | 1354 (13.9%) | 0.37    | 173 (12.7%)                                          | 1347 (14.1%) | 0.16    |
| Cerebrovascular disease         | 134 (12.0%)                                         | 1305 (13.4%) | 0.20    | 139 (10.2%)                                          | 1300 (13.6%) | 0.0005  |
| Cancer                          | 172 (15.4%)                                         | 1362 (13.9%) | 0.19    | 186 (13.7%)                                          | 1348 (14.2%) | 0.65    |
| Chronic kidney disease          | 82 (7.3%)                                           | 776 (7.9%)   | 0.47    | 69 (5.1%)                                            | 789 (8.3%)   | <0.0001 |
| Asthma                          | 200 (17.9%)                                         | 1206 (12.3%) | <0.0001 | 254 (18.7%)                                          | 1152 (12.1%) | <0.0001 |
| Depression                      | 310 (27.7%)                                         | 2278 (23.3%) | 0.0011  | 377 (27.8%)                                          | 2211 (23.2%) | 0.0002  |



**Table S9. Clinical characteristics of 1,118 patients with complete clinical data from Danish Register of Chronic obstructive Pulmonary Disease (COPD).**

FEV<sub>1</sub>% = forced expiratory volume in 1 second expressed as percentage of predicted; GOLD = Global Initiative for Chronic Obstructive Lung Disease; mMRC = modified Medical Research Council; BMI = body mass index.

| Characteristic                   | Value       |
|----------------------------------|-------------|
| N                                | 1,118       |
| FEV <sub>1</sub> %, median (IQR) | 46 (33, 61) |
| GOLD class                       |             |
| 1                                | 71 (6.4%)   |
| 2                                | 417 (37.3%) |
| 3                                | 423 (37.8%) |
| 4                                | 207 (18.5%) |
| mMRC dyspnoea score              |             |
| 0-1                              | 327 (29.2%) |
| 2                                | 350 (31.3%) |
| 3                                | 256 (22.9%) |
| 4                                | 185 (16.5%) |
| BMI                              |             |
| 10 - 18.4                        | 115 (10.3%) |
| 18.5 - 24.9                      | 456 (40.8%) |
| 25+                              | 547 (48.9%) |
| Smoking status                   |             |
| Non smoker                       | 754 (67.4%) |
| Smoker                           | 364 (32.6%) |

**Table S10. Usage of secondary prevention medications within 90 days after first-time myocardial infarction in patients with COPD.** Numbers represent the numbers and proportions of users among 7,217 patients alive and free of exacerbations at 90 days of follow-up. Medication use was defined as one or more claimed prescription. ACEi = angiotensin-converting enzyme inhibitor; ARB = angiotensin II receptor blocker.

| Medication                      | Number of users, n(%) |
|---------------------------------|-----------------------|
| Aspirin                         | 5,104 (70.7%)         |
| Statin                          | 5,571 (77.2%)         |
| Aspirin + statin                | 4,251 (58.9%)         |
| Aspirin + statin + beta-blocker | 3,079 (42.7%)         |
| ACEi or ARB                     | 3,776 (52.3%)         |
| ACEi or ARB + beta-blocker      | 2,637 (36.5%)         |

**Figure S1. Directed acyclic graph (DAG) illustrating identification of potential confounders between beta-blocker use and exacerbations of chronic obstructive pulmonary disease (AECOPD).**

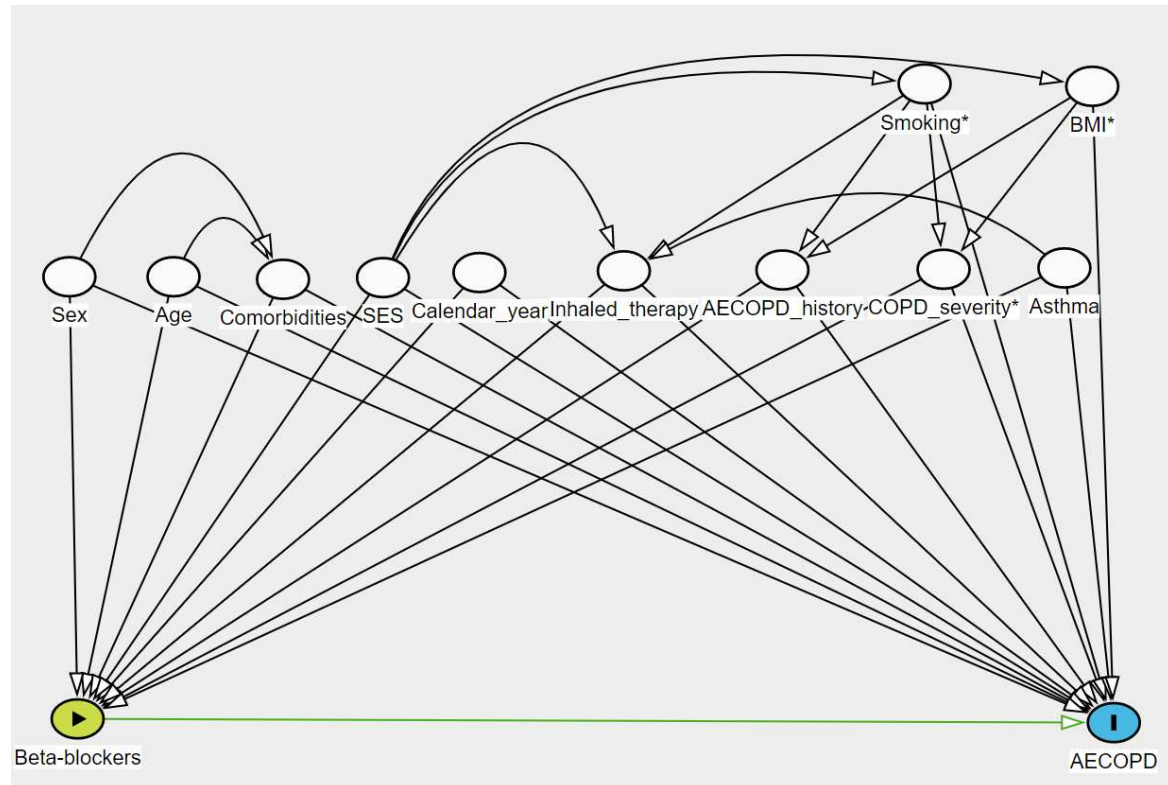

SES = socio-economic status (income). BMI = body mass index.

\*: COPD severity (lung function and dyspnoea score), smoking status, and BMI were only available in a subgroup of patients and was only included in subgroup analyses of patients with complete clinical data.

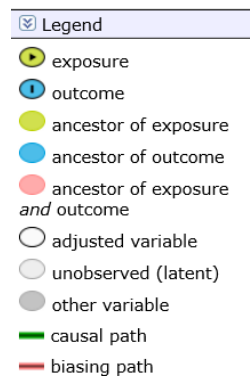

Supplement: inline-supplementary-material-1 [file inline-supplementary-material-1.pdf]
